# Supplementary material for: Associations between Green Space and Health in English Cities: An Ecological, Cross-Sectional Study
Source: PubMed Central journal article supplement (PMC4361406; doi:10.1371/journal.pone.0119495), 2015-03-16
Supplement: pone.0119495.s001.pdf [file pone.0119495.s001.pdf]

**TABLE S1.** Male and female age-standardised mortality ratios by causes of death: all-causes, lung cancer, suicide and cardiovascular disease shown by cities in order of greenness.

| City           | All-causes |      | Cardiovascular disease |      | Lung cancer |      | Suicide |      |
|----------------|------------|------|------------------------|------|-------------|------|---------|------|
|                | Female     | Male | Female                 | Male | Female      | Male | Female  | Male |
| York           | 0.73       | 0.83 | 0.66                   | 0.84 | 0.68        | 0.68 | 0.50    | 0.96 |
| Huddersfield   | 1.02       | 1.04 | 1.18                   | 1.08 | 0.87        | 0.94 | 1.41    | 1.54 |
| Brighton       | 1.02       | 1.12 | 0.79                   | 0.89 | 0.78        | 1.17 | 2.95    | 1.42 |
| St. Helens     | 1.13       | 1.11 | 1.22                   | 1.09 | 1.05        | 1.04 | 0.54    | 1.09 |
| Middlesbrough  | 1.15       | 1.04 | 1.21                   | 1.02 | 1.46        | 1.25 | 1.08    | 0.97 |
| Stoke-on-Trent | 1.11       | 1.07 | 1.08                   | 1.04 | 1.09        | 1.22 | 0.83    | 1.09 |
| Cambridge      | 0.76       | 0.77 | 0.57                   | 0.64 | 0.54        | 0.77 | 2.33    | 1.23 |
| Exeter         | 0.79       | 0.81 | 0.77                   | 0.80 | 0.84        | 0.63 | 1.33    | 1.24 |
| Peterborough   | 0.92       | 0.92 | 0.88                   | 0.95 | 0.87        | 0.89 | 0.79    | 0.97 |
| Watford        | 0.71       | 0.71 | 0.55                   | 0.73 | 0.68        | 0.82 | 1.24    | 0.95 |
| Sheffield      | 0.94       | 0.90 | 0.87                   | 0.92 | 1.06        | 0.91 | 0.84    | 0.88 |
| Oldham         | 1.34       | 1.29 | 1.46                   | 1.37 | 1.62        | 1.29 | 0.62    | 1.64 |
| Rotherham      | 1.09       | 1.11 | 1.13                   | 0.98 | 1.21        | 1.30 | 0.66    | 1.51 |
| Oxford         | 0.86       | 0.84 | 0.72                   | 0.76 | 0.64        | 0.90 | 1.71    | 0.89 |
| Norwich        | 0.86       | 0.87 | 0.71                   | 0.80 | 0.82        | 0.86 | 1.14    | 1.18 |
| Bolton         | 1.27       | 1.20 | 1.41                   | 1.24 | 1.31        | 1.08 | 1.15    | 0.93 |
| Preston        | 1.06       | 1.01 | 1.01                   | 0.92 | 1.07        | 0.95 | 0.95    | 1.12 |
| Ipswich        | 0.75       | 0.72 | 0.64                   | 0.71 | 0.63        | 0.67 | 0.94    | 0.89 |
| Gloucester     | 0.81       | 0.90 | 0.83                   | 0.88 | 0.60        | 0.54 | 0.97    | 1.01 |
| Milton Keynes  | 0.85       | 0.79 | 0.74                   | 0.79 | 0.84        | 0.89 | 0.42    | 0.87 |
| Derby          | 0.92       | 0.87 | 1.04                   | 0.88 | 0.92        | 0.72 | 1.07    | 1.05 |
| Leeds          | 1.02       | 1.08 | 1.04                   | 1.06 | 1.34        | 1.28 | 1.24    | 1.09 |
| Reading        | 0.77       | 0.76 | 0.59                   | 0.76 | 0.55        | 0.78 | 0.95    | 0.86 |
| Plymouth       | 0.89       | 0.92 | 0.94                   | 0.94 | 1.03        | 0.99 | 0.76    | 0.96 |
| Bradford       | 1.11       | 1.10 | 1.29                   | 1.21 | 1.24        | 1.01 | 1.41    | 1.04 |

|                     |      |      |      |      |      |      |      |      |
|---------------------|------|------|------|------|------|------|------|------|
| Sunderland          | 1.02 | 1.08 | 1.07 | 0.99 | 1.36 | 1.17 | 0.66 | 1.00 |
| Northampton         | 0.93 | 0.88 | 1.00 | 0.81 | 0.66 | 0.77 | 0.83 | 0.88 |
| Hull                | 1.02 | 1.03 | 1.03 | 1.03 | 1.24 | 1.21 | 0.73 | 0.72 |
| Leicester           | 1.05 | 0.98 | 1.11 | 1.09 | 0.77 | 0.74 | 1.09 | 0.94 |
| Blackburn           | 1.22 | 1.21 | 1.05 | 1.25 | 1.12 | 1.09 | 2.37 | 1.36 |
| Swindon             | 0.87 | 0.76 | 0.93 | 0.80 | 0.88 | 0.76 | 1.10 | 0.91 |
| Coventry            | 1.10 | 0.99 | 0.98 | 0.96 | 1.04 | 0.95 | 1.31 | 1.02 |
| Southend-on-Sea     | 0.91 | 0.89 | 0.79 | 0.79 | 0.89 | 0.85 | 1.20 | 0.81 |
| Bristol             | 0.90 | 0.91 | 0.84 | 0.89 | 0.78 | 0.83 | 0.93 | 0.97 |
| Stockport           | 1.04 | 1.02 | 1.17 | 1.04 | 1.23 | 1.15 | 1.13 | 0.91 |
| Birmingham          | 0.98 | 1.02 | 1.05 | 1.11 | 0.86 | 0.98 | 0.62 | 0.75 |
| Luton               | 0.97 | 0.94 | 0.91 | 0.97 | 0.66 | 0.86 | 1.23 | 1.10 |
| Nottingham          | 1.10 | 1.14 | 1.22 | 1.14 | 1.20 | 1.22 | 1.02 | 1.18 |
| Poole               | 0.74 | 0.67 | 0.60 | 0.63 | 0.65 | 0.55 | 1.34 | 0.77 |
| Slough              | 0.86 | 0.89 | 1.00 | 1.08 | 0.80 | 0.71 | 0.58 | 0.73 |
| Portsmouth          | 0.99 | 0.99 | 1.01 | 1.02 | 1.00 | 0.94 | 0.89 | 1.04 |
| Southampton         | 0.97 | 0.90 | 0.96 | 0.90 | 0.99 | 0.98 | 0.95 | 1.10 |
| Newcastle upon Tyne | 1.10 | 1.20 | 1.22 | 1.15 | 1.47 | 1.49 | 0.87 | 1.00 |
| Dudley              | 0.90 | 0.89 | 0.86 | 0.87 | 0.57 | 0.88 | 0.49 | 0.78 |
| Manchester          | 1.31 | 1.37 | 1.42 | 1.40 | 1.53 | 1.51 | 1.07 | 1.19 |
| Bournemouth         | 0.83 | 0.89 | 0.65 | 0.64 | 0.65 | 0.87 | 1.62 | 1.31 |
| West Bromwich       | 1.16 | 1.23 | 1.27 | 1.36 | 0.99 | 1.31 | 1.36 | 0.85 |
| Liverpool           | 1.23 | 1.23 | 1.24 | 1.22 | 1.35 | 1.34 | 0.74 | 0.95 |
| Wolverhampton       | 1.03 | 1.06 | 1.07 | 1.05 | 0.96 | 1.05 | 0.70 | 0.79 |
| Blackpool           | 1.30 | 1.34 | 1.12 | 1.27 | 1.56 | 1.13 | 1.31 | 2.00 |
