# Supplementary material for: Associations between Green Space and Health in English Cities: An Ecological, Cross-Sectional Study
Source: PubMed Central journal article supplement (PMC4361406; doi:10.1371/journal.pone.0119495), 2015-03-16
Supplement: pone.0119495.s002.pdf [file pone.0119495.s002.pdf]

**TABLE S2.** Age-standardised mortality risk ratios by cause of death in each green space quintile compared with the least green quintile (reference category).

| City                  | Sex | Green space coverage quintile |                     |                    |                    |                    |
|-----------------------|-----|-------------------------------|---------------------|--------------------|--------------------|--------------------|
|                       |     | 1                             | 2                   | 3                  | 4                  | 5                  |
| All-cause mortality   | M   | 1                             | 0.92 (0.86 – 0.99)* | 0.92 (0.86 – 1.00) | 0.93 (0.86 – 1.00) | 0.94 (0.88 – 1.02) |
|                       | F   | 1                             | 0.96 (0.89 – 1.03)  | 0.93 (0.86 – 1.00) | 0.95 (0.88 – 1.03) | 0.94 (0.87 – 1.01) |
| CVD mortality         | M   | 1                             | 0.98 (0.89 – 1.07)  | 0.96 (0.88 – 1.06) | 0.94 (0.85 – 1.04) | 0.95 (0.86 – 1.05) |
|                       | F   | 1                             | 1.00 (0.89 – 1.13)  | 0.98 (0.87 – 1.11) | 0.95 (0.83 – 1.08) | 0.94 (0.83 – 1.07) |
| Suicide               | M   | 1                             | 0.83 (0.70 – 0.99)* | 0.84 (0.71 – 1.01) | 0.91 (0.76 – 1.11) | 1.02 (0.86 – 1.23) |
|                       | F   | 1                             | 0.94 (0.67 – 1.31)  | 0.95 (0.68 – 1.34) | 0.81 (0.56 – 1.18) | 1.10 (0.77 – 1.57) |
| Lung cancer mortality | M   | 1                             | 0.89 (0.79 – 1.02)  | 0.92 (0.81 – 1.05) | 0.93 (0.80 – 1.07) | 0.97 (0.84 – 1.12) |
|                       | F   | 1                             | 1.00 (0.84 – 1.19)  | 1.04 (0.87 – 1.24) | 1.06 (0.88 – 1.29) | 1.01 (0.84 – 1.22) |

\* indicates statistical significance at the p = 0.05 level
